# Supplementary material
Source: PubMed Central journal article supplement (PMC3677108)

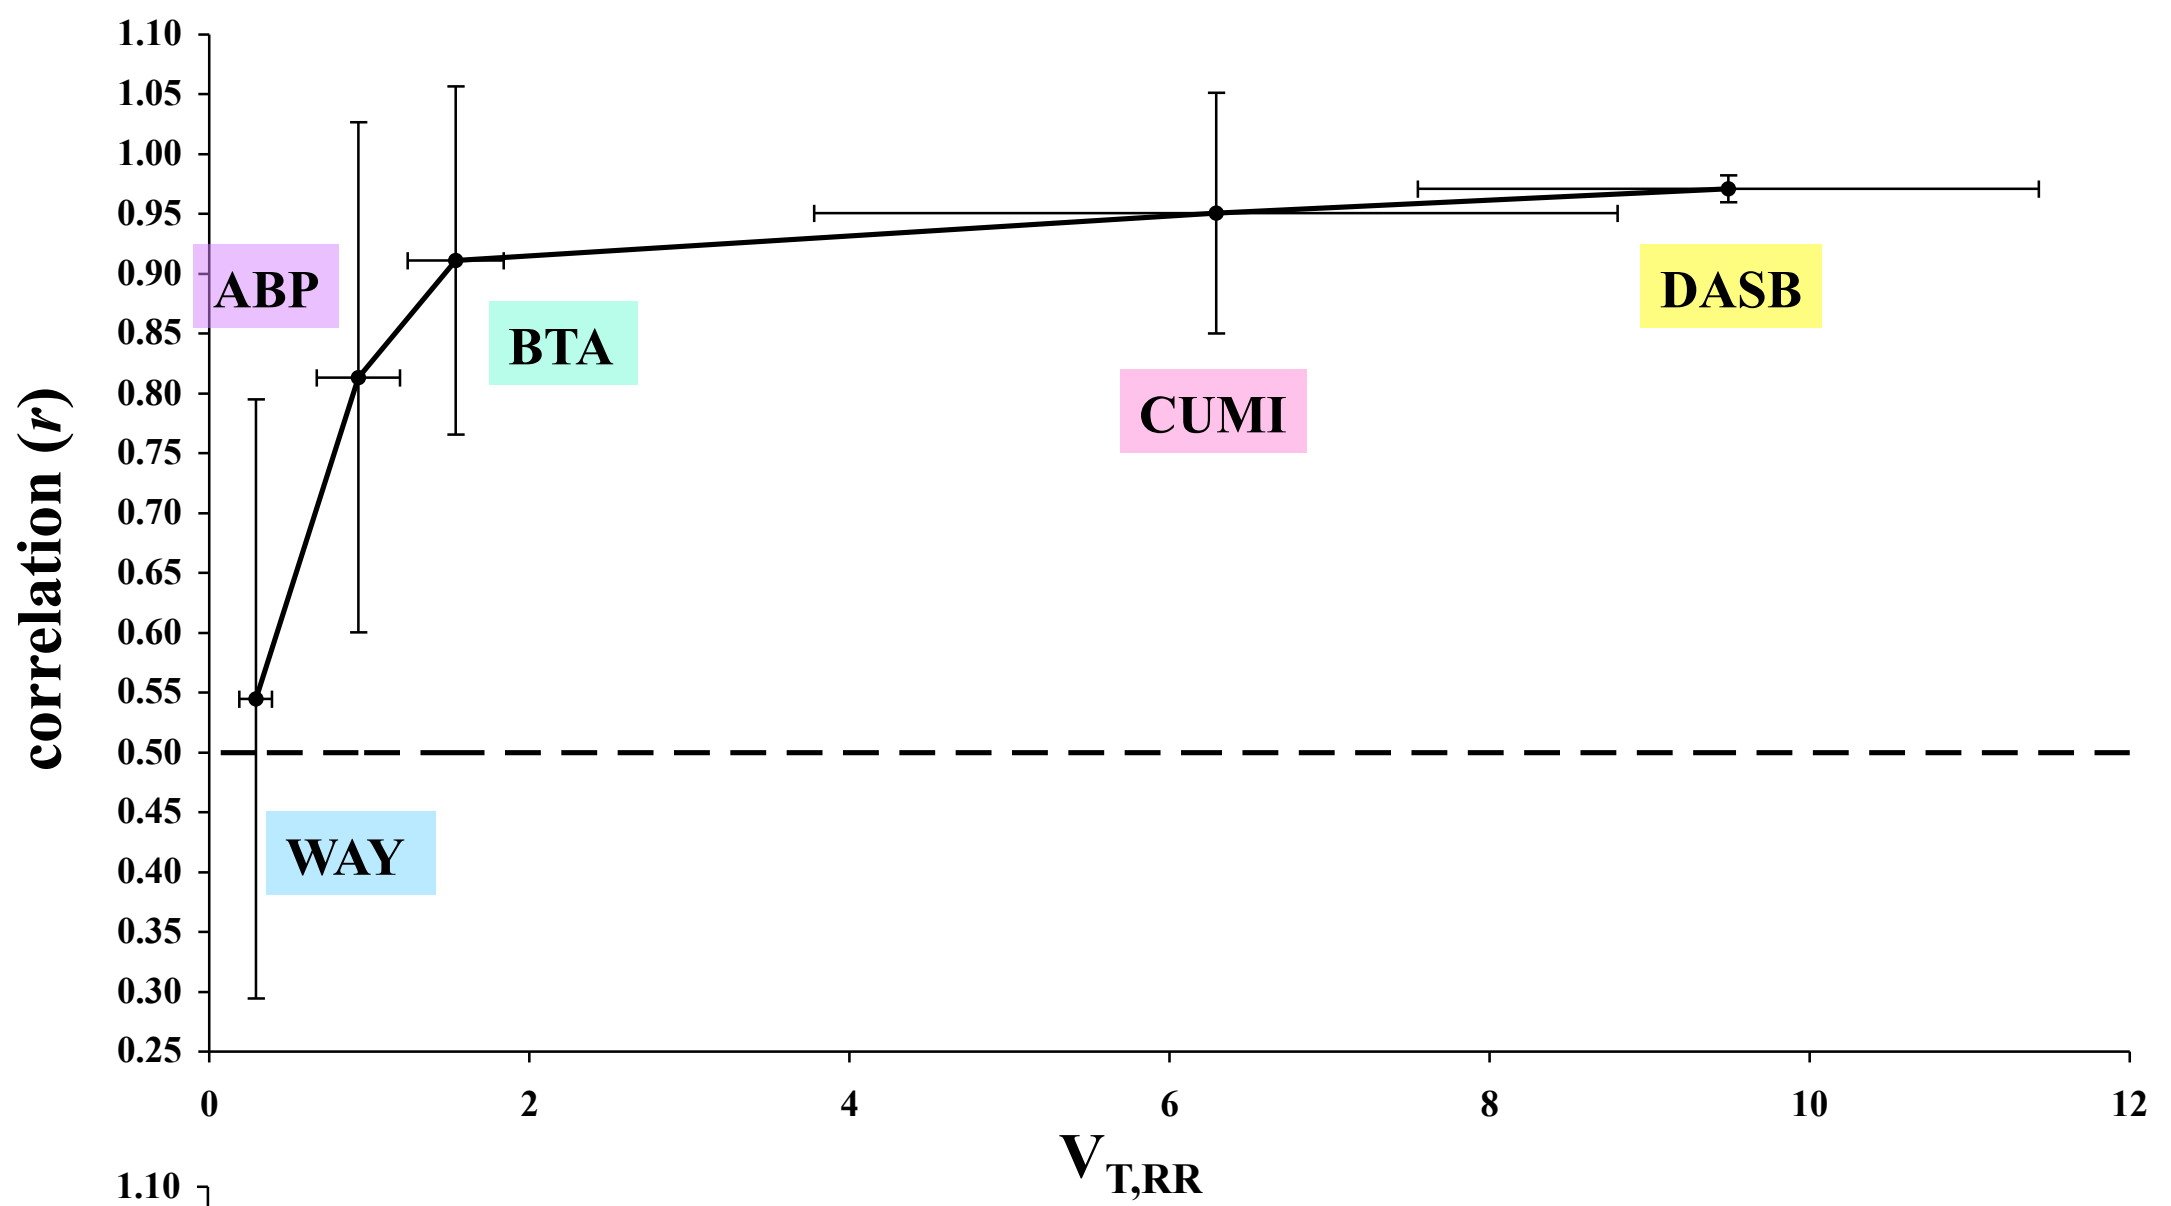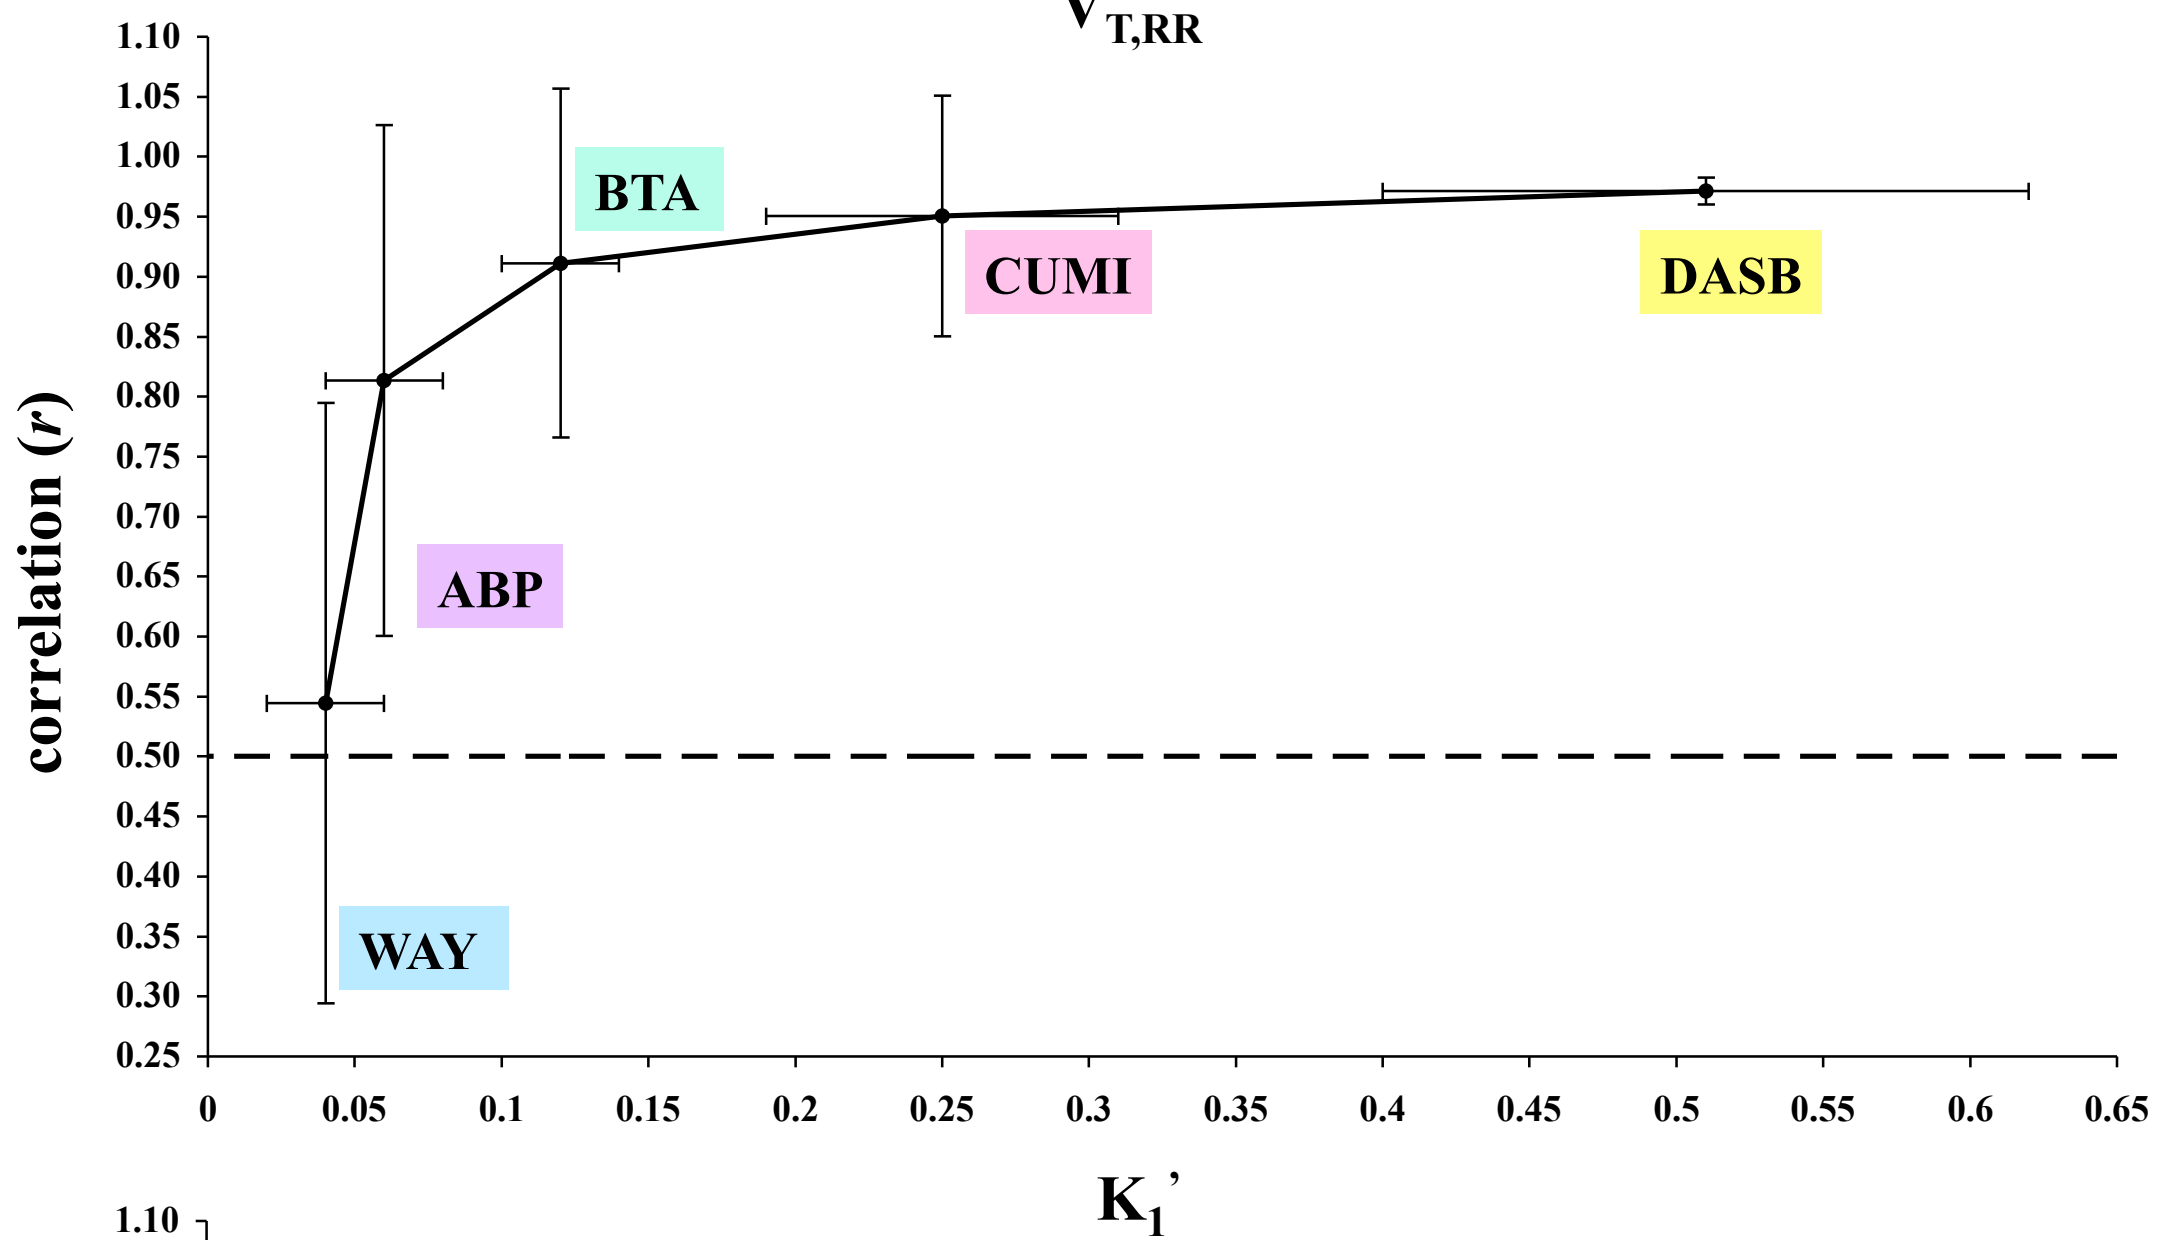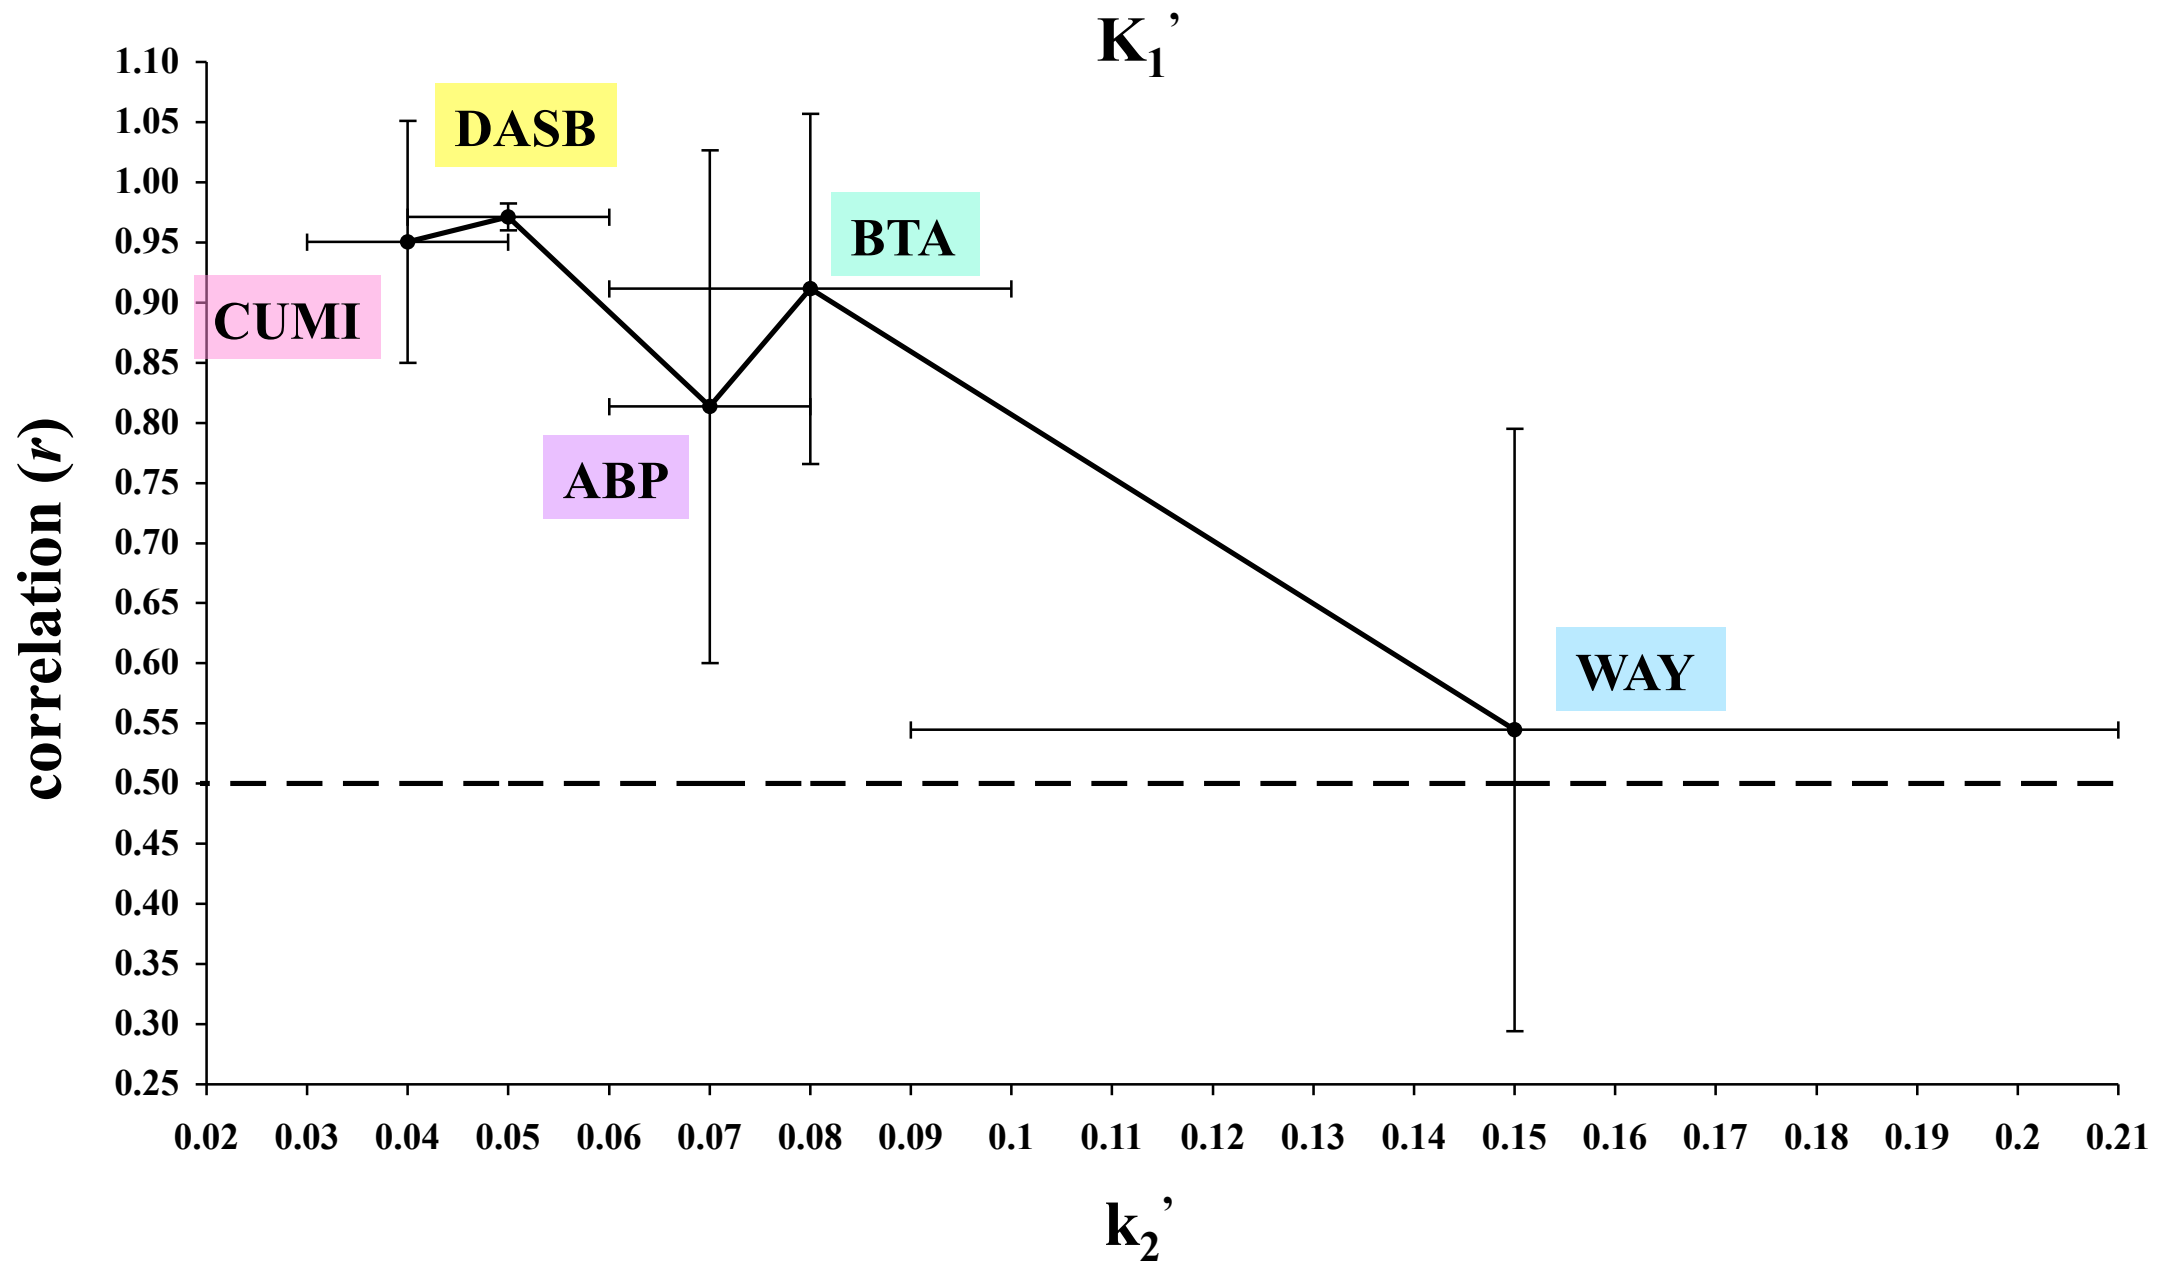

Supplement: jcbfm201326x1.pdf [file jcbfm201326x1.pdf]

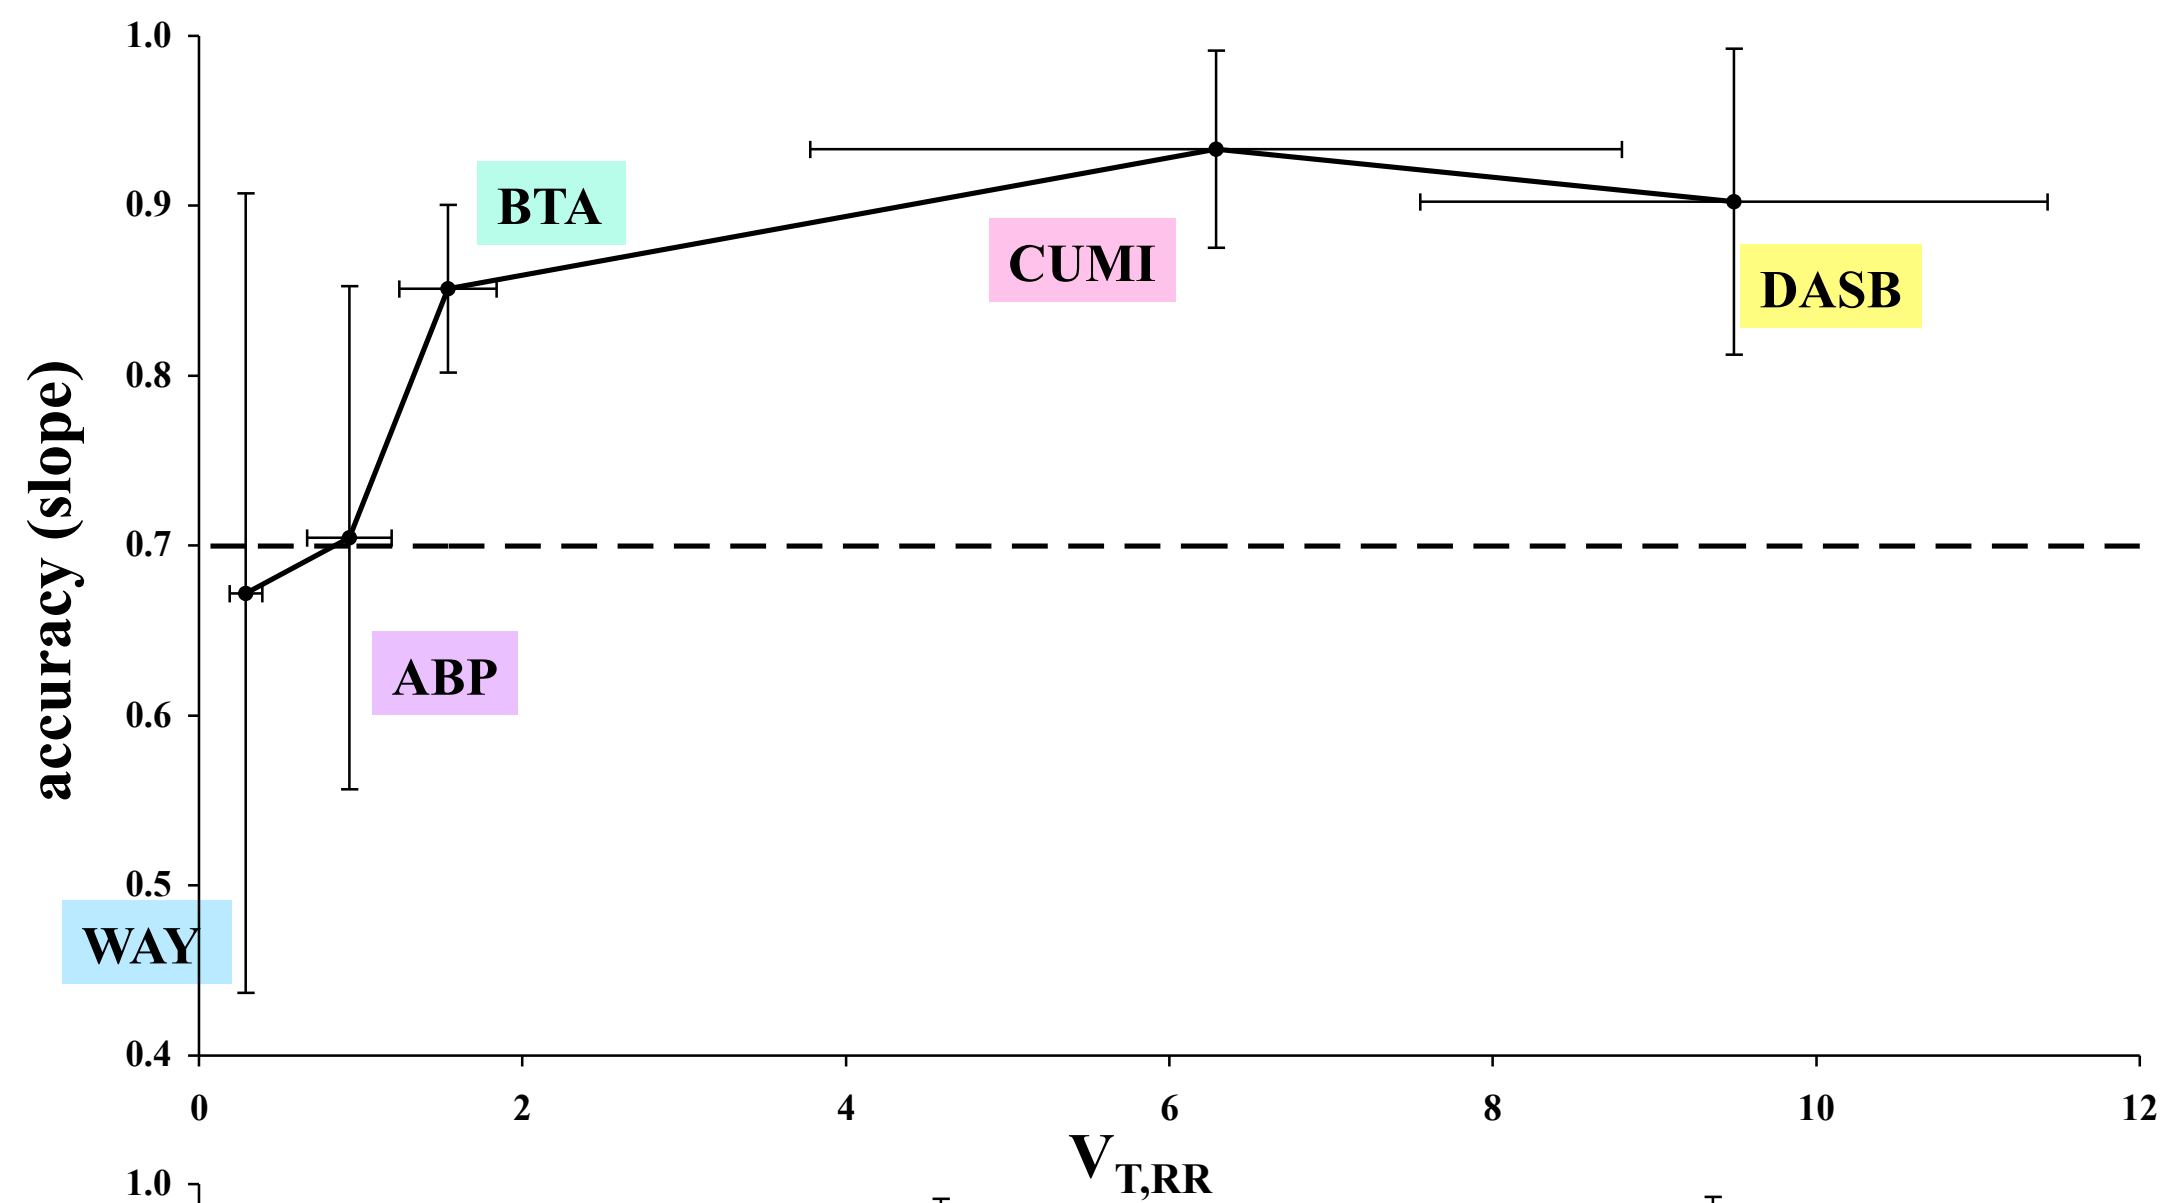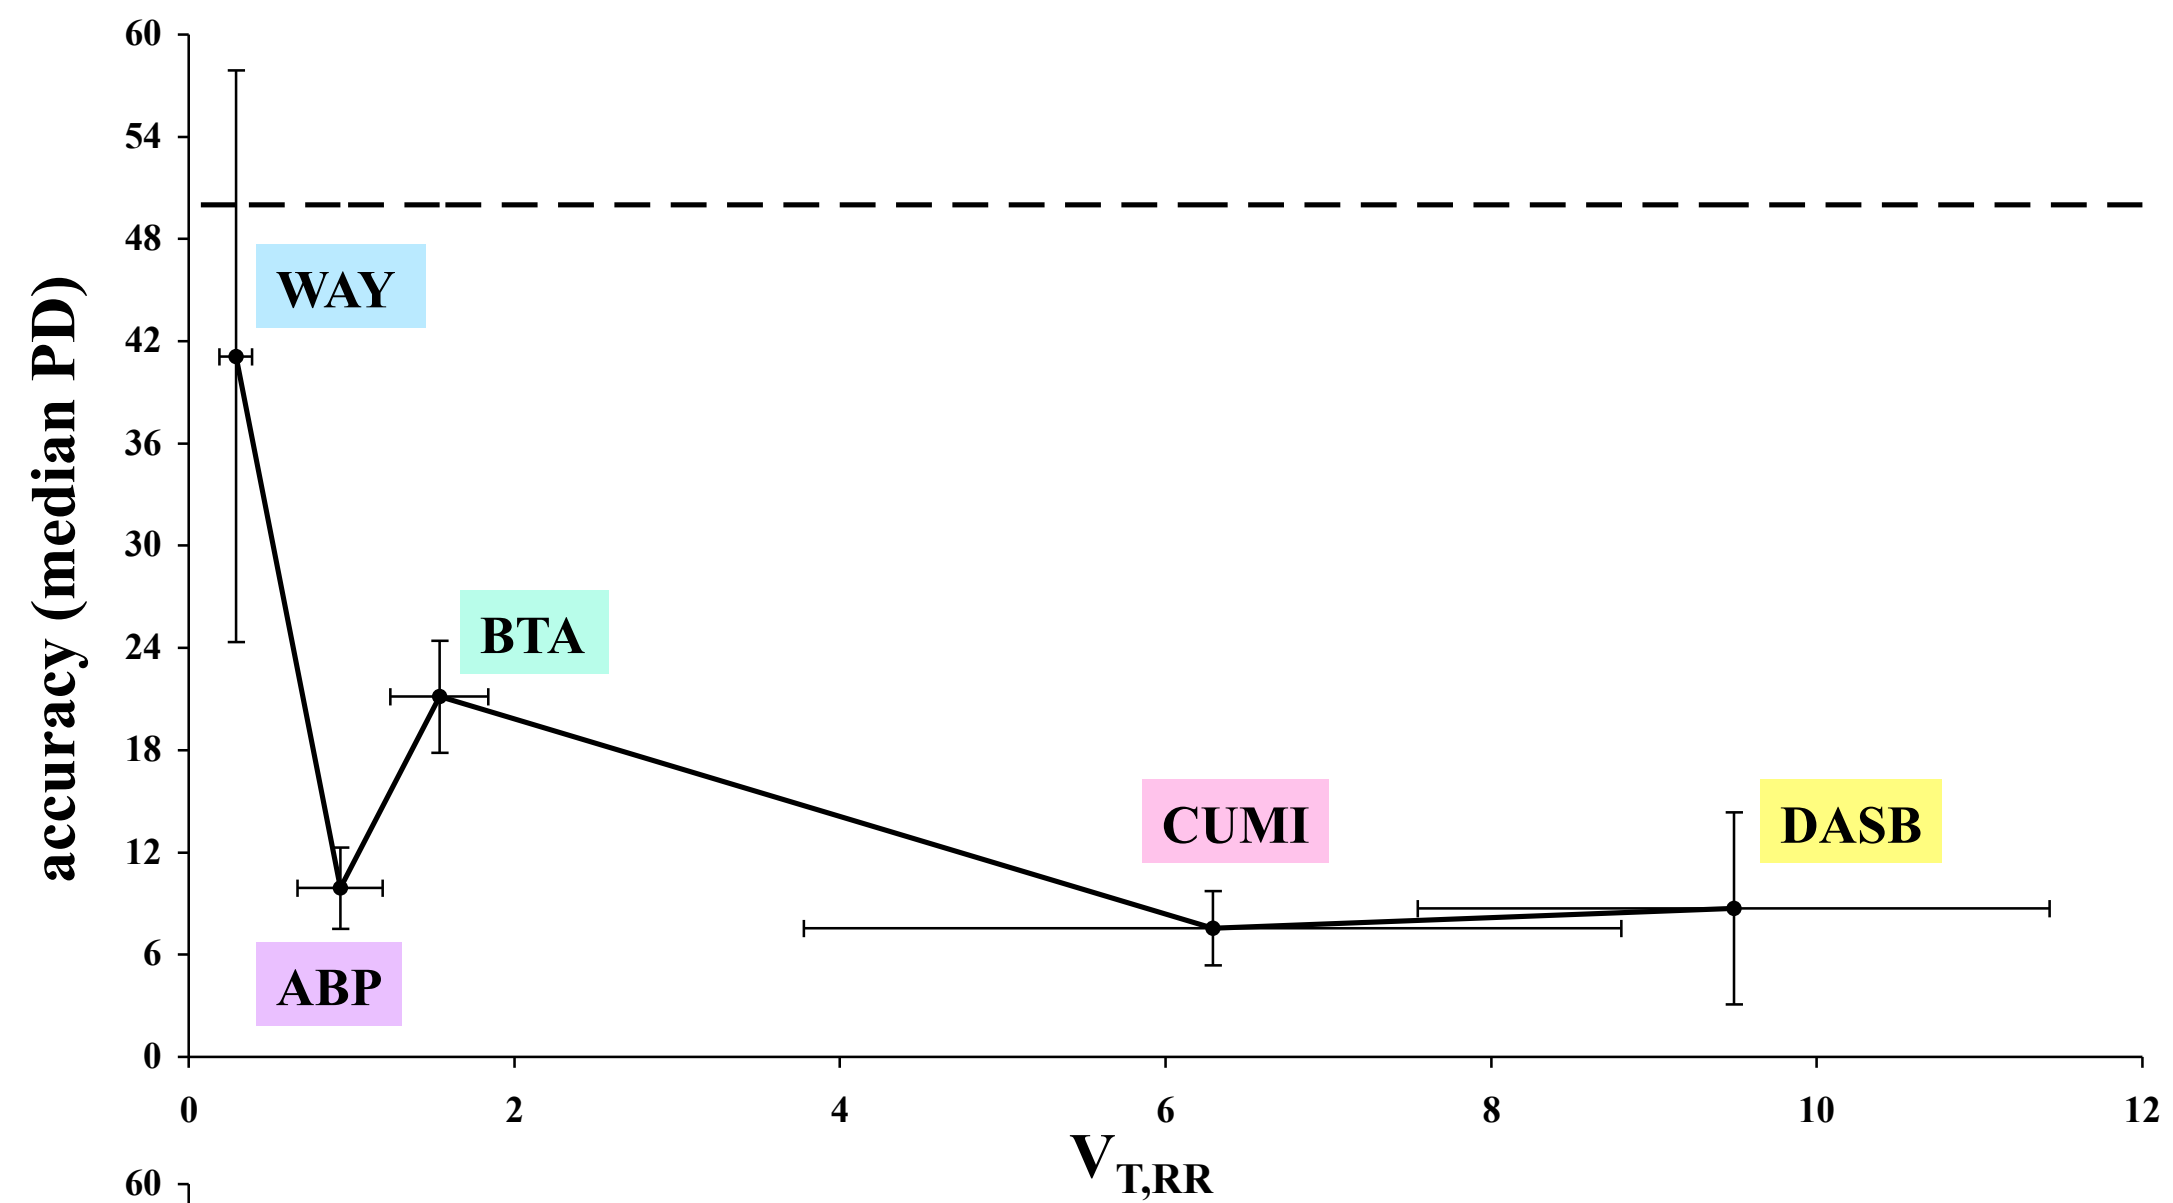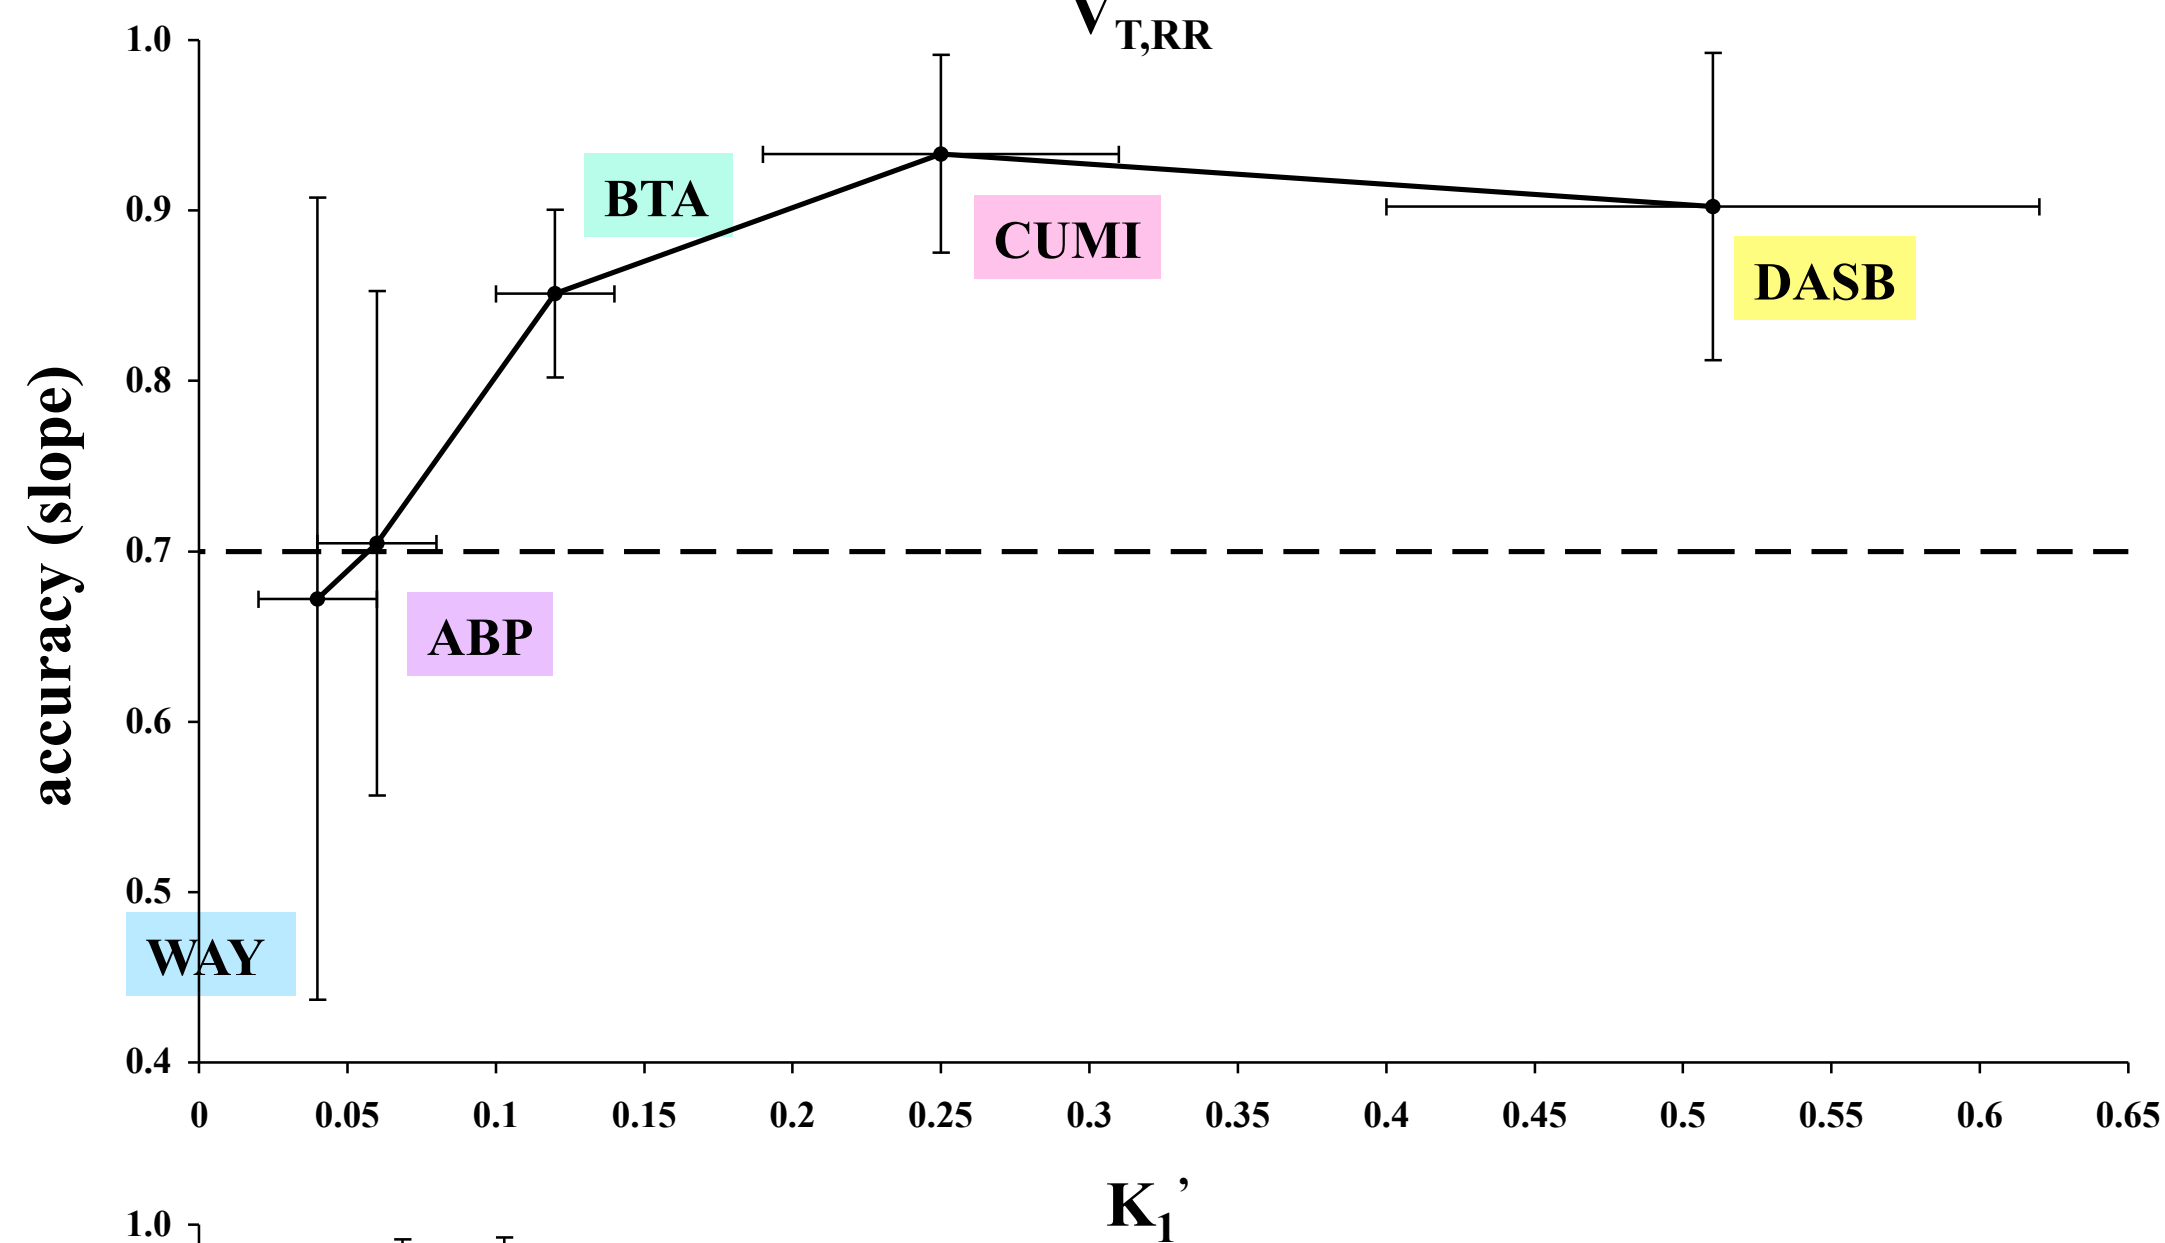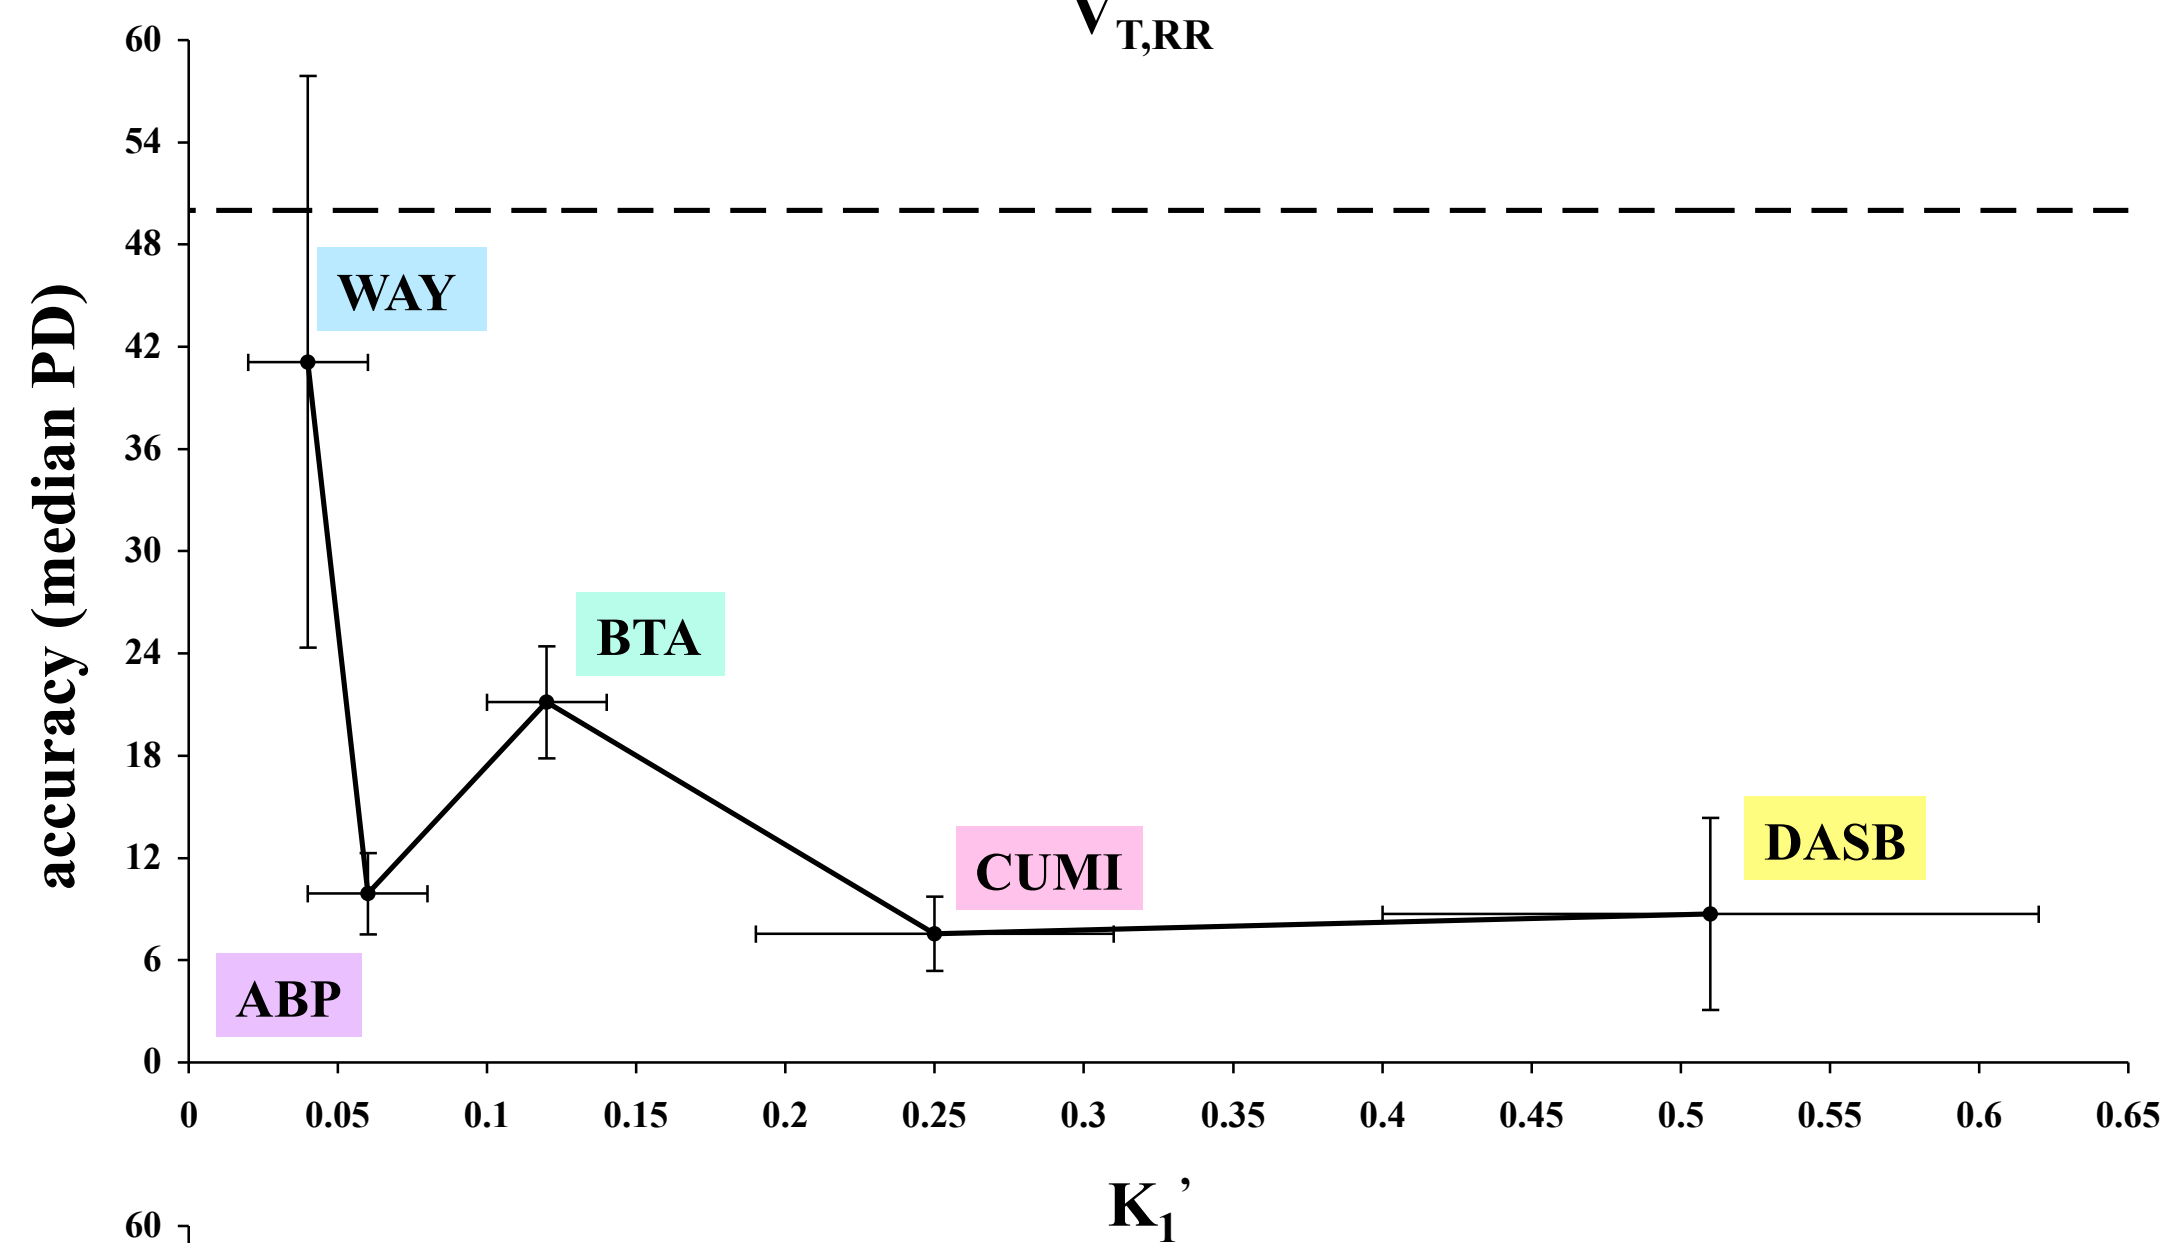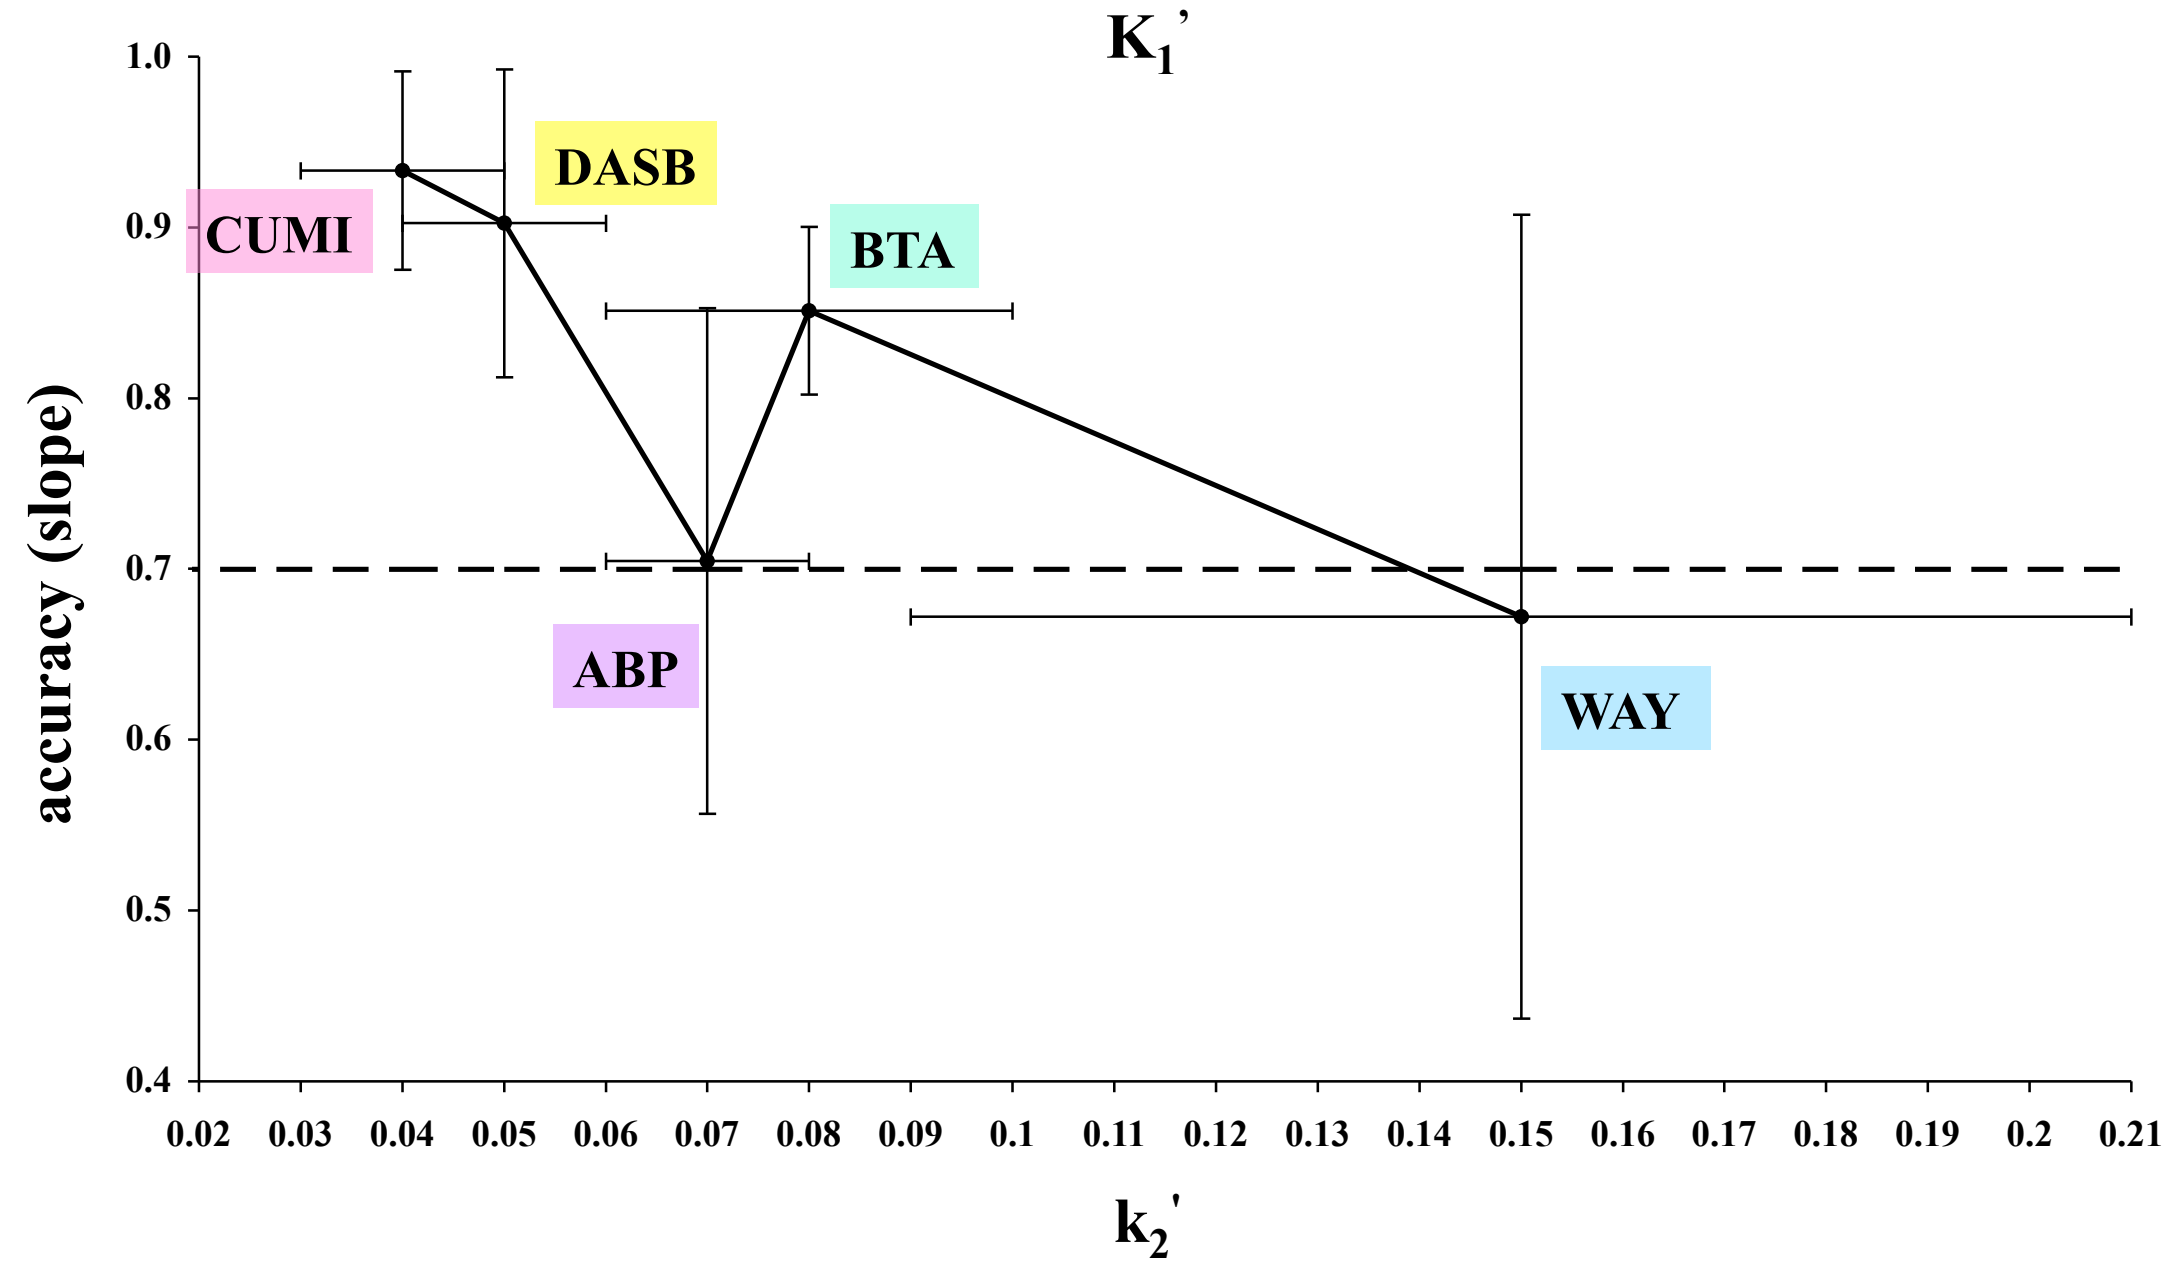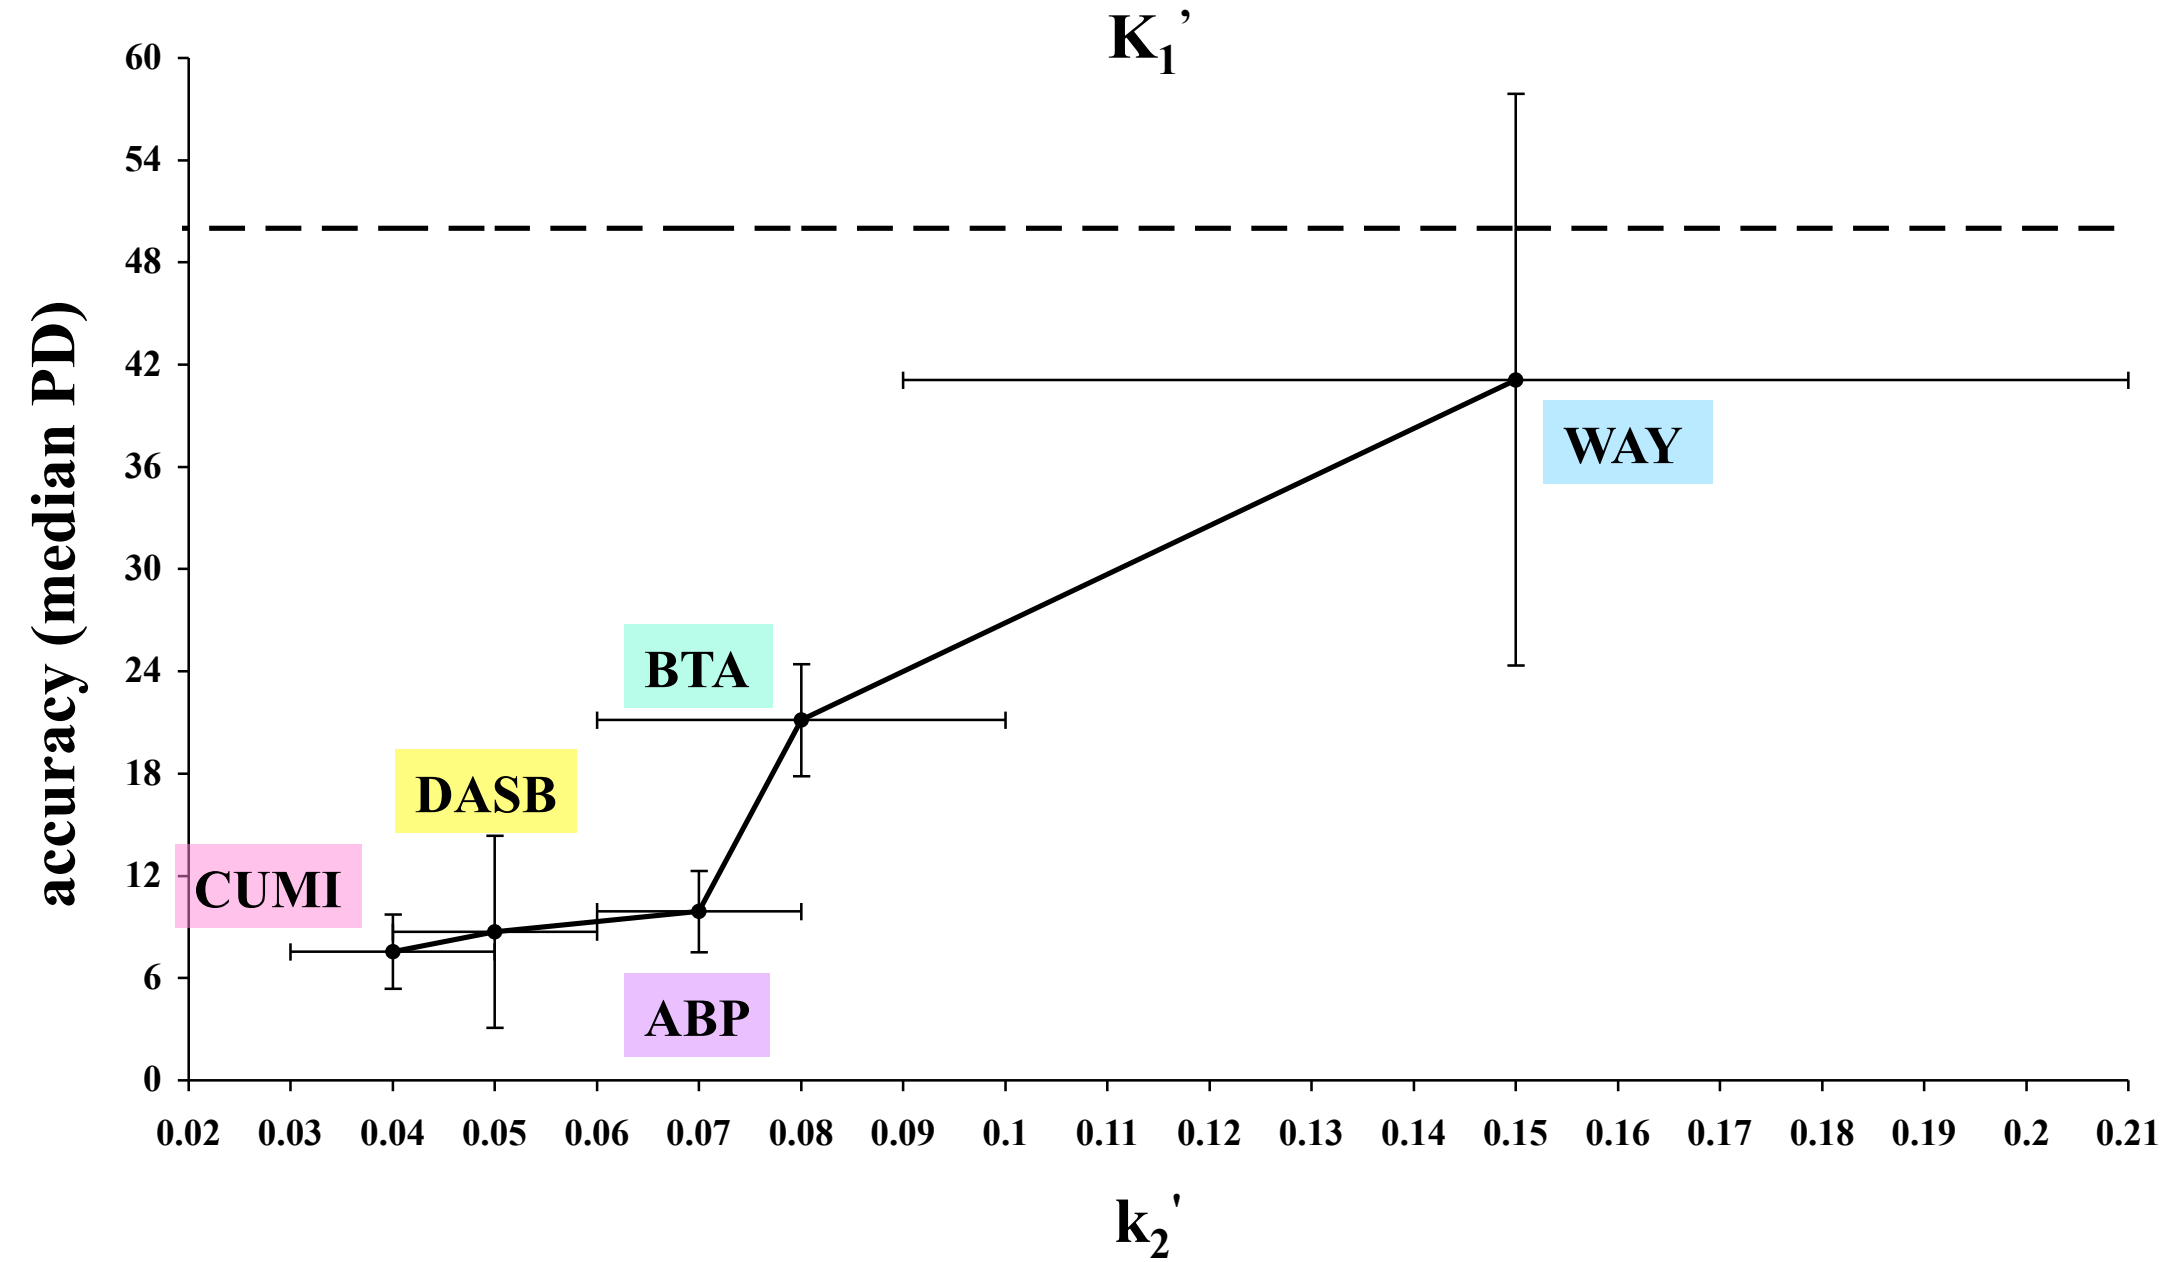

Supplement: jcbfm201326x2.pdf [file jcbfm201326x2.pdf]
